# Supplementary material for: Blue Autofluorescence Fundus Imaging for Monitoring Retinal Degeneration in Royal College of Surgeons Rats
Source: PubMed Central journal article supplement — Transl Vis Sci Technol. 2019 Feb 28;8(1):26. doi: 10.1167/tvst.8.1.26 (PMC6396687; doi:10.1167/tvst.8.1.26), 2019-02-28
Supplement: tvst-08-01-20_s01.pdf [file tvst-08-01-20_s01.pdf]

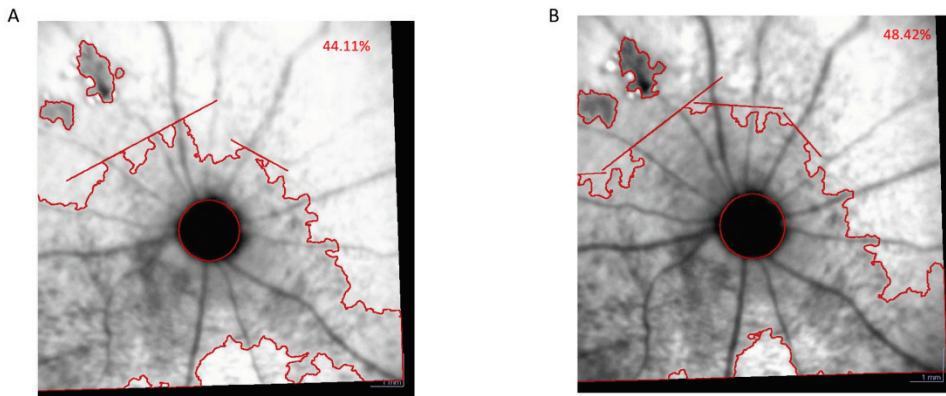

**Supplementary Figure 1. The effect of different lighting settings on hyperfluorescent area quantification.**

**(A)** A representative image of the central retina scanned using maximum lighting setting (107). **(B)** The same central retinal area scanned using manually selected lower lighting setting (101). The hypofluorescent area is delineated in red and the percentage of hypofluorescent area out the entire picture is denoted in white in each image.

Note the black edges of the pictures which are created when the software automatically aligns the scan to match the same location in the retina in a previous time point.
