# Supplementary material for: Blue Autofluorescence Fundus Imaging for Monitoring Retinal Degeneration in Royal College of Surgeons Rats
Source: PubMed Central journal article supplement — Transl Vis Sci Technol. 2019 Feb 28;8(1):26. doi: 10.1167/tvst.8.1.26 (PMC6396687; doi:10.1167/tvst.8.1.26), 2019-02-28
Supplement: tvst-08-01-20_s02.pdf [file tvst-08-01-20_s02.pdf]

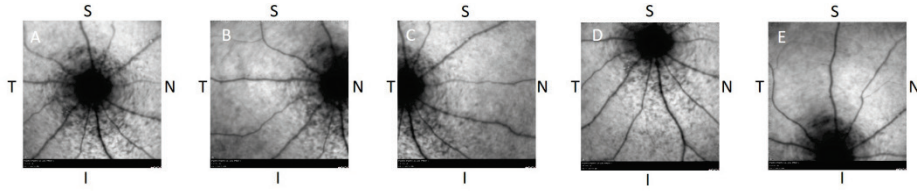

**Supplementary Figure 2. The Sequence of BL-FAF image acquisition.**

A representative example of the BL-FAF image acquisition sequence in the right eye. The first image was taken with the optic disc centered to visualize the central retina **(A)**. The camera was moved to position the optic disc on the right of the image to visualize the temporal retina **(B)**; then the camera was moved to position the optic disc on the left side of the image to visualize the nasal retina **(C)**. The camera was then moved to position the disc at the top of the image to visualize the inferior retina **(D)**. The last scan was taken while positioning the disc at the bottom of the image to visualize the superior retina **(E)**. T-Temporal, N-Nasal, S- Superior, I-Inferior.
