# Supplementary material for: Blue Autofluorescence Fundus Imaging for Monitoring Retinal Degeneration in Royal College of Surgeons Rats
Source: PubMed Central journal article supplement — Transl Vis Sci Technol. 2019 Feb 28;8(1):26. doi: 10.1167/tvst.8.1.26 (PMC6396687; doi:10.1167/tvst.8.1.26), 2019-02-28
Supplement: tvst-08-01-20_s04.pdf [file tvst-08-01-20_s04.pdf]

Supplementary Figure 4

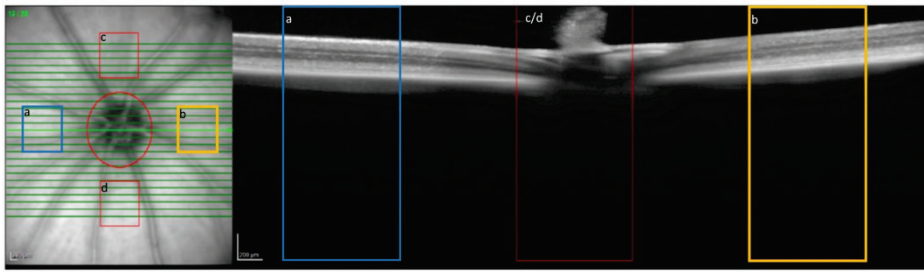

**Supplementary Figure 4. The template used for assessment of retinal layer thicknesses.**

An infra-red fundus image (left) and the SD-OCT scan at the matching location (right). The Green arrow on the fundus image (left panel) indicates the position of the SD-OCT scan (right panel). The colored rectangles (marked a-d) denote the designated areas for measurement. A single measurement was taken within each sector, a total of 4 measurements per eye, per time point.
