# Supplementary material for: Blue Autofluorescence Fundus Imaging for Monitoring Retinal Degeneration in Royal College of Surgeons Rats
Source: PubMed Central journal article supplement — Transl Vis Sci Technol. 2019 Feb 28;8(1):26. doi: 10.1167/tvst.8.1.26 (PMC6396687; doi:10.1167/tvst.8.1.26), 2019-02-28
Supplement: tvst-08-01-20_s05.pdf [file tvst-08-01-20_s05.pdf]

## Supplementary Figure 5

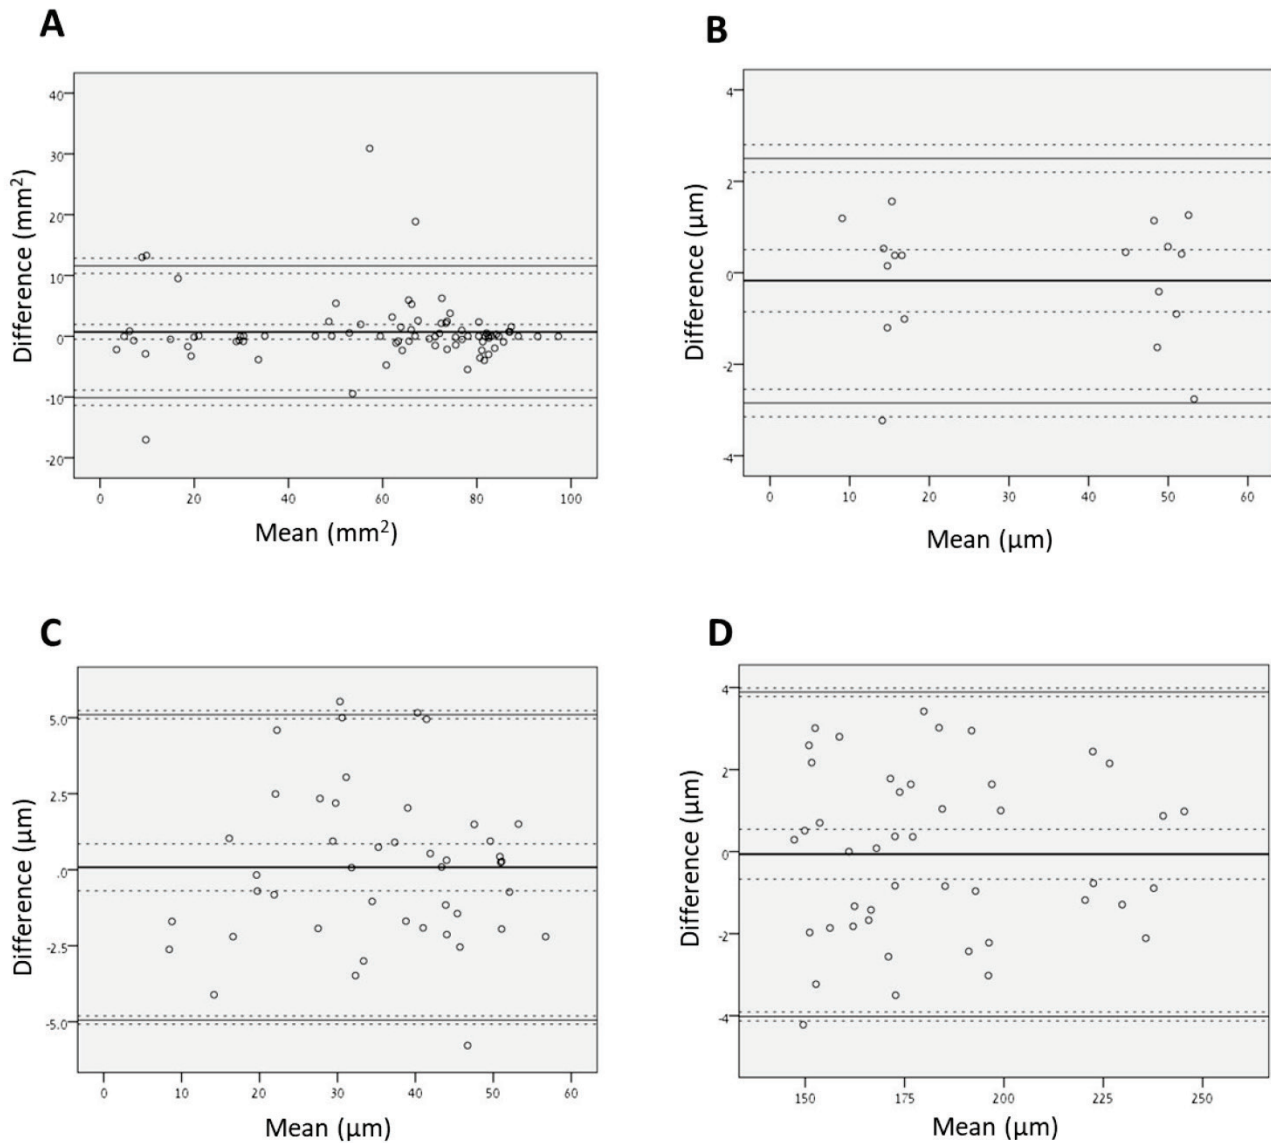

### Supplementary Figure 5. Bland–Altman analysis for inter-observer agreement of the two readers.

Bland–Altman analysis of the difference between the measures taken by readers 1 and 2 of BL-FAF area **(A)** and SD-OCT thickness of ONL **(B)** DZ **(C)** and total retina **(D)** versus the mean of measurements. The mean bias is presented as a bold black line. Limits of agreement (LOA) are indicated by thin black lines and the respective 95% confidence intervals of the mean bias and LOA are marked with dashed lines.
