# Supplementary material for: Blue Autofluorescence Fundus Imaging for Monitoring Retinal Degeneration in Royal College of Surgeons Rats
Source: PubMed Central journal article supplement — Transl Vis Sci Technol. 2019 Feb 28;8(1):26. doi: 10.1167/tvst.8.1.26 (PMC6396687; doi:10.1167/tvst.8.1.26), 2019-02-28
Supplement: tvst-08-01-20_s06.pdf [file tvst-08-01-20_s06.pdf]

Supplementary Figure 6

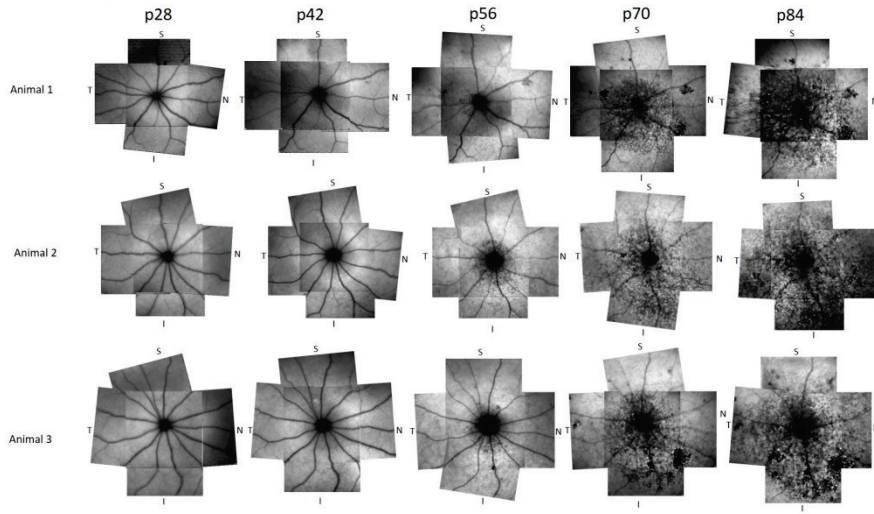

**Supplementary Figure 6. BL-FAF longitudinal follow-up in three representative RCS rats.**

BL-FAF imaging was performed at indicated days postnatal in three representative RCS rats. Each panel is a composite of five BL-FAF scans. To generate the composite image, the size of the optic disc was matched and then the images were aligned according to the blood vessel orientation.

T- Temporal, N- Nasal, S- Superior, I-Inferior.
